# Supplementary material for: Biodiversity and trophic ecology of hydrothermal vent fauna associated with tubeworm assemblages on the Juan de Fuca Ridge
Source: Copernicus journal article supplement (doi:10.5194/bg-15-2629-2018), 2018-05-04
Supplement: Supplementary file 1 [file bg-15-2629-2018-supplement.zip]

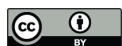

## *Supplement of*

# **Biodiversity and trophic ecology of hydrothermal vent fauna associated with tubeworm assemblages on the Juan de Fuca Ridge**

**Yann Lelièvre et al.**

*Correspondence to:* Yann Lelièvre ([yann.lelievre10@gmail.com](mailto:yann.lelievre10@gmail.com))

- [bg-15-2629-2018-supplement-title-page.pdf](#)
- Supplementary Information
  - [Video legend\\_SI.pdf](#)
  - [Video\\_S1\\_Polynoidae.mp4](#)

The copyright of individual parts of the supplement might differ from the CC BY 4.0 License.
